# Supplementary material for: HIV-1 Env trimers asymmetrically engage CD4 receptors in membranes
Source: PubMed Central journal article supplement (PMC10686830; doi:10.1038/s41586-023-06762-6), 2023-11-22
Supplement: 41586_2023_6762_MOESM1_ESM.pdf [file 41586_2023_6762_MOESM1_ESM.pdf]

---

**Supplementary information**

---

**HIV-1 Env trimers asymmetrically engage  
CD4 receptors in membranes**

---

In the format provided by the  
authors and unedited

**Supplementary Table 1 | Summary table of Cryo-EM data collection**

|                                        | Unliganded<br>HIV-1 Env<br>(EMDB-<br>41045) | HIV-1 Env<br>bound to one<br>CD4<br>(EMDB-<br>29292) | HIV-1 Env<br>bound to two<br>CD4<br>(EMDB-<br>29293) | HIV-1 Env<br>bound to<br>three CD4<br>(EMDB-<br>29294) | Consensus<br>structure of<br>HIV-1 Env<br>bound to CD4<br>(EMDB-<br>29295) |
|----------------------------------------|---------------------------------------------|------------------------------------------------------|------------------------------------------------------|--------------------------------------------------------|----------------------------------------------------------------------------|
| <b>Data collection and processing</b>  |                                             |                                                      |                                                      |                                                        |                                                                            |
| Magnification                          | 300                                         | 300                                                  | 300                                                  | 300                                                    | 300                                                                        |
| Voltage (kV)                           |                                             |                                                      |                                                      |                                                        |                                                                            |
| Electron exposure (e-/Å <sup>2</sup> ) | 123                                         | 123                                                  | 123                                                  | 123                                                    | 123                                                                        |
| Defocus range (µm)                     | -0.5 (VPP)                                  | -0.5 (VPP)                                           | -0.5 (VPP)                                           | -0.5 (VPP)                                             | -0.5 (VPP)                                                                 |
| Pixel size (Å)                         | 2.7                                         | 2.7                                                  | 2.7                                                  | 2.7                                                    | 2.7                                                                        |
| Symmetry imposed                       | C3                                          | C1                                                   | C1                                                   | C1                                                     | C1                                                                         |
| Initial particle images<br>(no.)       | 6444                                        | 5712                                                 | 5712                                                 | 5712                                                   | 5712                                                                       |
| Final particle images<br>(no.)         | 6339                                        | 2341                                                 | 1418                                                 | 1953                                                   | 5712                                                                       |
| Map resolution (Å)                     | 9                                           | 17                                                   | 19                                                   | 16                                                     | 15                                                                         |
| FSC threshold                          | 0.5 cutoff                                  | 0.5 cutoff                                           | 0.5 cutoff                                           | 0.5 cutoff                                             | 0.5 cutoff                                                                 |

Source Data of Extended Data Figure 1

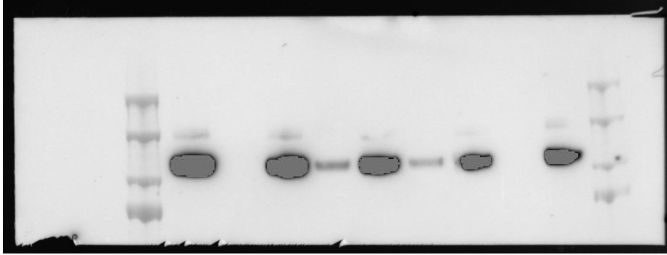

2G12 (anti-gp120)

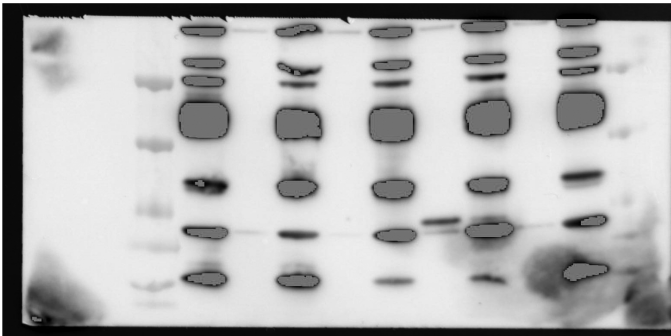

Human anti-HIV-1 Neutralizing Serum
